RESEARCH ARTICLE

# The Role of the Two-Component System BaeSR in Disposing Chemicals through Regulating Transporter Systems in *Acinetobacter baumannii*

Ming-Feng Lin<sup>1,2</sup>, Yun-You Lin<sup>2</sup>, Chung-Yu Lan<sup>2,3\*</sup>

**1** Department of Medicine, National Taiwan University Hospital Chu-Tung Branch, Hsin-Chu City, Taiwan,

**2** Institute of Molecular and Cellular Biology, National Tsing Hua University, Hsin-Chu City, Taiwan,

**3** Department of Life Science, National Tsing Hua University, Hsin-Chu City, Taiwan

\* [cylan@life.nthu.edu.tw](mailto:cylan@life.nthu.edu.tw)

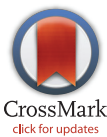

**OPEN ACCESS**

**Citation:** Lin M-F, Lin Y-Y, Lan C-Y (2015) The Role of the Two-Component System BaeSR in Disposing Chemicals through Regulating Transporter Systems in *Acinetobacter baumannii*. PLoS ONE 10(7): e0132843. doi:10.1371/journal.pone.0132843

**Editor:** Feng Gao, Tianjin University, CHINA

**Received:** January 20, 2015

**Accepted:** June 19, 2015

**Published:** July 10, 2015

**Copyright:** © 2015 Lin et al. This is an open access article distributed under the terms of the [Creative Commons Attribution License](https://creativecommons.org/licenses/by/4.0/), which permits unrestricted use, distribution, and reproduction in any medium, provided the original author and source are credited.

**Data Availability Statement:** All relevant data are within the paper.

**Funding:** This study was supported by a grant from National Taiwan University Hospital Chu-Tung Branch. The funder had no role in study design, data collection and analysis, decision to publish, or preparation of the manuscript.

**Competing Interests:** The authors have declared that no competing interests exist.

## Abstract

Bacterial two-component regulatory systems (TCSs) facilitate changes in gene expression in response to environmental stimuli. TCS BaeR regulons influence tigecycline susceptibility in *Acinetobacter baumannii* through positively regulating the pump genes *adeA* and *adeB*. In this study, we demonstrate that an additional two transport systems, AdelJK and MacAB-ToIC, are also regulated by BaeSR. In the wild type and clinical tigecycline-resistant *A. baumannii* strains, gene expression of AdelJK and MacAB-ToIC increased after tigecycline induction, implicating their importance to tigecycline resistance in addition to AdeABC. Phenotypic microarray results showed that *A. baumannii* is vulnerable to certain chemicals, especially tannic acid, after deleting *baeR*, which was confirmed using the spot assay. The wild-type strain of *A. baumannii* also exhibited 1.6-fold and 4.4-fold increase in gene expression of *adeJ* and *macB* in the medium with 100 µg/mL tannic acid, but the increase was fully inhibited by *baeR* deletion. An electrophoretic motility shift assay based on an interaction between His-BaeR and the *adeA*, *adel* and *macA* promoter regions did not demonstrate direct binding. In conclusion, *A. baumannii* can use the TCS BaeSR in disposing chemicals, such as tannic acid and tigecycline, through regulating the efflux pumps.

## Introduction

Efflux pumps actively export antibiotics from the bacterial cell and are, thus, one of the mechanism that contribute to multidrug resistance in bacteria [1]. Four categories of efflux pumps, including the resistance-nodulation-cell division (RND) superfamily, the major facilitator superfamily (MFS), the multidrug and toxic compound extrusion (MATE) family and the small multidrug resistance (SMR) family of transporters, reportedly relate to antimicrobial resistance in *A. baumannii* [2,3]. CraA [4] and Tet [2], belonging to the MFS efflux pumps, are conferring to chloramphenicol and tetracycline resistance respectively. AbeM [5], the only

efflux pump of the MATE family described so far in *A. baumannii*, is shown to extrude aminoglycosides, fluoroquinolones, chloramphenicol, and trimethoprim. AbeS [6], a novel SMR transporter, confers low level resistance to several antimicrobial agents. Of these four different pump categories, the RND superfamily plays the most important role in multidrug resistance. AdeABC is the first well-characterized RND-type efflux pump in *A. baumannii* and is associated with lower cell susceptibility to several antimicrobials, including tigecycline [7,8]. Inactivation of an additional two RND-type pumps, AdeFGH [9] and AdeIJK [10–12], also indicates that they contribute to multidrug resistance in *A. baumannii*. However, efflux pumps not only confer resistance to certain classes of antibiotics but can also export other natural substances or chemical compounds, indicating that they might play a role in allowing bacteria to survive in their ecological niche [13]. Although the ability of efflux pumps, such as AmvA [14], AbeM [5], and AbeS [6], to dispose of certain chemicals in addition to antibiotics has been described in previous studies of *A. baumannii*, the complete picture of this phenotype and its regulatory mechanisms are still unclear.

Previous studies have identified local or global regulators that are involved in efflux gene expression [3]. The best studied example of local regulators in *A. baumannii* is the AdeRS TCS, which is a positive activator for the AdeABC efflux pump [15]. Point mutations in AdeS and AdeR or AdeS truncation due to ISAbal1 insertion may be related to AdeABC overexpression, which leads to multidrug resistance [15,16]. Another example of a local regulator for an RND-type pump in *A. baumannii* is AdeN, which is a TetR-type regulator responsible for regulating AdeIJK expression [17]. The expression of various efflux pumps is also controlled by different global regulators. In *Escherichia coli*, general stress-induced *acrAB* pump gene transcription is primarily mediated by a global regulator pathway [18]. In our previous study, we proposed BaeSR, which is an envelope system that responds to stress from external stimuli, as a global regulator to influence *adeAB* transcription and, thus, tigecycline susceptibility in *A. baumannii* [19].

Environmental stress, which damages the outer membrane or disrupts periplasmic homeostasis in Gram negative bacteria, can stimulate the envelope stress response (ESR) [20]. Five extracytoplasmic stress response pathways have been described for *E. coli*, including BaeSR, which belongs to a TCS [21]. The main function of the Bae response is to upregulate efflux pump expression in response to specific envelope-damaging agents [22]. Indole, flavonoids, and sodium tungstate are novel BaeSR response inducers [22,23]. The Bae regulon is involved in defenses to zinc toxicity [24], novobiocin and deoxycholate resistance [25], and condensed tannin resistance [26]. A phenotype microarray analysis using *E. coli* TCS gene mutants showed increased sensitivity in the *baeSR* mutant to myricetin, gallic acid, nickel chloride and, especially, sodium tungstate [27]. In *Salmonella typhimurium*, the Bae TCS increases multidrug and metal resistance by inducing the AcrD and MdtABC drug efflux systems [28]. A genome-wide analysis of *E. coli* gene expression showed that BaeR overproduction activates genes involved in multidrug transport, flagellum biosynthesis, chemotaxis, and maltose transport [29]. In *A. baumannii*, an LPS-deficient strain showed increased expression of genes that encode BaeS/R orthologs and of genes that encode MDR-associated proteins, such as *macAB-tolC* and *adeIJK* [30].

However, the relationship between BaeSR and certain transporter genes, such as *adeIJK* and *macAB-tolC* is not fully understood in *A. baumannii*. Because *A. baumannii* is exquisite in adapting its environment and coping with external stress, especially in the hospitals, this study is aimed at understanding the role of BaeSR as a stress response system for disposing chemicals through regulating transporter genes in *A. baumannii*.

## Materials and Methods

### Bacterial strains, growth conditions, antimicrobial susceptibility test and DNA manipulation

The bacterial strains used in this study are listed in [Table 1](#). The cells were commonly grown at 37°C in LB broth and agar. For inducing tigecycline resistance, serial passaging was performed as our previous study [19]. To determine the minimal inhibitory concentration (MIC) of tigecycline, a broth microdilution method according to the 2012 CLSI guidelines [31] was used. The MIC was defined as lowest tigecycline concentration that completely inhibited bacterial growth, and bacterial growth was determined by unaided eyes and by measuring optical density (OD) using a spectrophotometer. The provisional MIC breakpoints for tigecycline are  $\leq 2$ , 4, and  $\geq 8$   $\mu\text{g/mL}$  to designate susceptible, intermediate, and resistant strains, respectively [32]. *A. baumannii* genomic DNA was extracted as described previously [33]. The DNA was PCR-amplified with a Hybaid PXE 0.2 HBPX02 Thermal Cycler (Thermo Scientific, Redwood, CA) using ProTaq DNA Polymerase (Protech, Taipei, Taiwan) or the KAPA HiFi PCR Kit (Kapa Biosystems, Boston, MA). The DNA fragments were extracted from agarose gels and purified as previously described [19]. The PCR products were verified by DNA sequencing.

### RNA isolation and quantitative reverse transcription (qRT)-PCR

Total RNA was isolated by the phenol-chloroform-isoamyl alcohol (PCIA) method. Briefly, the *A. baumannii* ATCC 17978 strain was grown overnight in LB broth at 37°C, 220 rpm for 16 hours. The overnight cultures ( $\text{OD}_{600} \sim 6.5$ ) were sub-cultured at a 1:100 dilution in 25 mL fresh LB medium in the absence of tigecycline. The cells were grown to mid-log phase (the  $\text{OD}_{600}$  values for ATCC 17978, AB1026, AB1027, AB1028, ABh1 and ABh1tc were all  $\sim 3$  and the  $\text{OD}_{600}$  values for both ABtc and ABtcm were  $\sim 2$ ) and harvested by centrifugation at 4°C. The cell pellets were resuspended in 200  $\mu\text{L}$  ice-cold lysis buffer (0.1 M Tris-Cl [pH 7.5], 0.1 M LiCl, 0.01 M ethylenediaminetetraacetic acid [pH 8.0], 5% sodium dodecyl sulfate [SDS], and 2%  $\beta$ -mercaptoethanol). Then, 200  $\mu\text{L}$  ice-cold PCIA ([25:24:1], pH 4.5) was added. The cells were lysed by vortexing for 2 minutes. Supernatants were collected by centrifugation, extracted with 200  $\mu\text{L}$  ice-cold PCIA. This step was repeated three times. Total RNA was precipitated with ethanol at  $-80^\circ\text{C}$  overnight and collected by centrifugation at maximum speed for 5 minutes and dissolved in dissolved in 25–100  $\mu\text{L}$  RNase-free water. DNA contaminants were removed using Ambion TURBO DNase (Life Technologies, Grand Island, NY). For cDNA synthesis, RNAs were reverse transcribed using High-Capacity cDNA Reverse Transcriptase Kit (Applied Biosystems). The cDNA samples were used in PCR reactions with different primers listed in [Table 1](#).

For qRT-PCR, a StepOne Real-Time PCR System (Life Technologies) was used with the primers listed in [Table 1](#). Briefly, each 15- $\mu\text{L}$  reaction mixture contained 25 ng cDNA, 7.5  $\mu\text{L}$  Power SYBR green PCR master mix (Life Technologies), and 300 nM each forward and reverse primer. The reactions were performed with 1 cycle at 95°C for 10 minutes, followed by 40 repeated cycles of 95°C for 15 seconds and 60°C for 1 minute. The 16S rRNA transcript was used as an endogenous control for the qRT-PCR. StepOne Software v2.1 (Life Technologies) was used in data analysis.

### Phenotype microarray analysis

The phenomes of the *A. baumannii* ATCC 17978 and its *baeR* mutant strains to various chemical compounds were assayed using the Biolog Phenotype MicroArray (PM) system (Biolog, Hayward, CA). Microplates PM15B, PM17A, and PM19 ([http://www.biolog.com/pdf/pm\\_lit/PM11-PM20.pdf](http://www.biolog.com/pdf/pm_lit/PM11-PM20.pdf)) containing total 72 compounds were used. All phenotypic experiments were

**Table 1. Bacterial strains, plasmids and primers used in this study.**

|                             | Strains                         | Relevant feature(s)                                                                                      | Source or reference                                                  |
|-----------------------------|---------------------------------|----------------------------------------------------------------------------------------------------------|----------------------------------------------------------------------|
| <i>A. baumannii</i> strains | ATCC 17978                      | Wild-type strain                                                                                         | ATCC                                                                 |
|                             | AB1026 ( $\Delta baeR::kan^r$ ) | Derived from ATCC 17978. <i>baeR</i> mutant obtained by <i>kan<sup>r</sup></i> gene replacement          | [19]                                                                 |
|                             | AB1027                          | AB1026 <i>baeR</i> ::pWH1266                                                                             | [19]                                                                 |
|                             | AB1028                          | ATCC 17978 <i>baeR</i> ::pWH1266                                                                         | [19]                                                                 |
|                             | ABtc                            | Induced tigecycline resistant ATCC 17978                                                                 | [19]                                                                 |
|                             | ABtcm ( $\Delta baeR::kan^r$ )  | Derived from ABtc. <i>baeR</i> mutant obtained by <i>kan<sup>r</sup></i> gene replacement                | [19]                                                                 |
|                             | ABh11                           | Tigecycline resistant clinical isolate                                                                   | [19]                                                                 |
|                             | ABh11tc                         | Clinical isolate with induced high tigecycline resistance                                                | This study                                                           |
|                             | <i>E. coli</i> strains          | BL21 (DE3) pLysS                                                                                         | As a competent cell that allow high-efficiency of protein expression |
| BL21 His-BaeR               |                                 | BL21 (DE3) pLysS carrying plasmid pET-23a-His-BaeR                                                       | This study                                                           |
|                             | Plasmids                        | Relevant feature(s)                                                                                      | Source or reference                                                  |
|                             | pET-23a(+)                      | Subcloning vector with a T7 promoter, N-terminal T7 tag and C-terminal 6xHis tag; <i>amp<sup>r</sup></i> | Novagen                                                              |
|                             | pET-23a(+)-His-BaeR             | pET-23a(+) carrying <i>A. baumannii</i> ATCC 17978 A1S_2883                                              | This study                                                           |
|                             | Primers                         | Relevant feature(s)                                                                                      | Source or reference                                                  |
|                             | pm_adeA_F                       | GCCTTCACGTTTTAAATA                                                                                       | This study                                                           |
|                             | pm_adeA_R                       | CCTAGTGAGTTTTGATG                                                                                        | This study                                                           |
|                             | pm_adel_F                       | ATTTTATCTAAACGAGGTGG                                                                                     | This study                                                           |
|                             | pm_adel_R                       | TTTCTGAGCAGCAGCAGC                                                                                       | This study                                                           |
|                             | pm_macA_F                       | GCGAGCCAAATCATTTC                                                                                        | This study                                                           |
|                             | pm_macA_R                       | CTTTTTAACCTGACCAGATACCTG                                                                                 | This study                                                           |
|                             | pET_check_F                     | CTCGATCCCGCAAATTA                                                                                        | This study                                                           |
|                             | pET_check_R                     | GCAGCCAACTCAGCTTCC                                                                                       | This study                                                           |
|                             | pET_baeR_Nhe1_F                 | AAAGCTAGCCACCACCACCACCACCACGGTATGTTTCATGATGG                                                             | This study                                                           |
|                             | pET_baeR_Xho1_R                 | TAAACCCTCGAGTTATTTCTTCTGGATATTCGAAGCGATAACCTACTCC                                                        | This study                                                           |
|                             | qbaeR_F                         | TGACAGCACGTACCGAAGAAA                                                                                    | [19]                                                                 |
|                             | qbaeR_R                         | CATAATCATCTGCCCCCATGT                                                                                    | [19]                                                                 |
|                             | qadeB_F                         | ACAAGACCGCGCTAACTTAGGT                                                                                   | [19]                                                                 |
|                             | qadeB_R                         | TGCCATTGCCATAAGTTCATCT                                                                                   | [19]                                                                 |
|                             | qadel_F                         | GGCCAATCTGGTCTGTTCTTC                                                                                    | This study                                                           |
|                             | qadel_R                         | CGGGTCAGTCTGGTTTGCA                                                                                      | This study                                                           |
|                             | qadeJ_F                         | AGCTGGTGCTATGGGCGTTA                                                                                     | This study                                                           |
|                             | qadeJ_R                         | GCCACCCCATGCAATACG                                                                                       | This study                                                           |
|                             | qadeK_F                         | TTCCAACAATCGGAGCAAGTG                                                                                    | This study                                                           |
|                             | qadeK_R                         | TTATTCGGATCACGGCTTTGA                                                                                    | This study                                                           |
|                             | qtolC_F                         | CTTACGGACCAGCTCTAGTGTCTTCT                                                                               | This study                                                           |
|                             | qtolC_R                         | CGCACTGTCATCTCCGAAT                                                                                      | This study                                                           |
|                             | qmacB_F                         | AATGAATGGCGGCGATGTA                                                                                      | This study                                                           |
|                             | qmacB_R                         | GTGAATCGAGTGCCCTGTT                                                                                      | This study                                                           |
|                             | qmacA_F                         | TTGGTCCATCTTCTGCGTTAA                                                                                    | This study                                                           |
|                             | qmacA_R                         | GCCGATTGCCCTGTTT                                                                                         | This study                                                           |
|                             | q16s rRNA_F                     | AGCATTTCGGATGGGAACCTTTA                                                                                  | [19]                                                                 |
|                             | q16s rRNA_R                     | GTCGTCCCCGCTTCCT                                                                                         | [19]                                                                 |

doi:10.1371/journal.pone.0132843.t001

performed per the manufacturer's protocol (Biolog). Following inoculation, all PM plates were incubated at 37°C for 24 hours. The bacterial growth was considered positive where the tetrazolium-based dye (colorless) reduced to formazan (violet), which was determined visually and using a Microplate Reader (Bio-Rad, Hercules, CA).

### Confirmation of the phenotype microarray data using a spot assay

To confirm the phenotype microarray analysis, spot assays were performed. *A. baumannii* ATCC 17978 and the *baeR* mutant strains were grown overnight in LB broth with or without kanamycin (37°C, 220 rpm, 16 h). The overnight cultures were sub-cultured in 3 mL LB broth (initial cell density, OD<sub>600</sub> = 0.3), grown to mid-log phase and harvested through centrifugation 6000 rpm for five minutes. The cell pellets were resuspended in 1 mL phosphate buffered saline (PBS). A ten-fold serial dilution of the bacterial suspension was performed using PBS. The bacteria were then spotted (10 µL/per spot) onto the LB agar plates containing different concentrations of tannic acid (Avantor, Center Valley, PA) and incubated at 37°C for 24 hours.

### BaeR protein purification

BaeR protein purification was performed as previously described [27] with certain modifications. Briefly, the His-tagged *baeR* gene (640 bp) was digested with restriction enzymes *NheI* and *XhoI* and ligated to the pET-23a(+) plasmid. The pET-23a(+)-His-BaeR was then transformed into the *Escherichia coli* BL21 (DE3) pLysS strain by heat shock method. A single colony of the transformant was inoculated into LB broth containing ampicillin (50 µg/mL) as well as chloramphenicol (30 µg/mL) and incubated at 37°C overnight (16 hours, with shaking 220 rpm). Cells from the overnight culture were sub-cultured (1:100 dilution) to a fresh LB broth, grown to OD<sub>600</sub> ~0.6, which was followed by adding 0.5 M isopropyl β-D-1-thiogalactopyranoside (IPTG) (final concentration 0.5 mM); the samples were then further incubated for 4 hours at 37°C and 180 rpm. Cell pellets were collected using centrifugation at 3000 x g and 4°C for 20 minutes, re-suspended in lysis buffer (20 mM NaPB [pH 7.5], 500 mM NaCl) containing 1 mg/mL hen egg white lysozyme (Sigma, St. Louis, MO), and incubated at 4°C for 10 minutes. Thereafter, the cells were lysed through sonication. His-tagged BaeR proteins were collected using centrifugation and maintained on ice before use. The His-BaeR proteins seemed to be in inclusion bodies (i.e., protein aggregates). The inclusion bodies were washed with lysis buffer, resuspended in solubilization buffer (50 mM NaPB [pH 8], 1 M NaCl, 8 M urea, 10% glycerol, and 5 mM imidazole), and centrifuged at 3000 x g and 4°C for 10 minutes. The insoluble materials were discarded, and the supernatant was then mixed with Ni-NTA agarose (Qiagen, Valencia, CA) that was equilibrated with the solubilization buffer. After shaking at room temperature for 1 hour and centrifugation (3000 x g, 4°C for 10 minutes), the agarose pellet was washed twice with 40 mL washing buffer (50 mM NaPB [pH 7] and 4 M urea) containing 0.1% triton X-114 and twice with 20 mL washing buffer. The His-BaeR protein was then purified using Nickel chelate agarose. To elute the Ni-chelated BaeR protein, elution buffer (50 mM NaPB [pH 7], 4 M urea, and 250 mM imidazole) was added to the agarose and mixed at room temperature for 20 minutes. All of the eluted supernatants were pooled together and dialyzed with modified elution buffer containing less urea (50 mM NaPB [pH 7] and 3 M urea, followed with the same buffer containing 2M urea) to eliminate the imidazole. The protein concentration was determined using the bicinchoninic acid (BCA) assay. To refold the His-BaeR protein, the solution was mixed with refolding buffer (20 mM NaPB [pH 7.3] and 10 mg/mL n-octyl-β-D-glucopyranoside [OG]) at 42°C for 16 hours and concentrated using an Amicon Ultra-4 centrifugal filter units (Millipore, Billerica, MA) in accordance with the manufacturer's instruction.

## Electrophoretic mobility shift assay (EMSA)

For the EMSA, a lightshift chemiluminescent EMSA kit (Thermo Scientific, Rockford, IL) was used, and the manufacturer's protocol was followed. We designed appropriate oligonucleotide pairs that included the putative binding regions for each pump gene. DNA labeling was performed using a Biotin 3' end DNA labeling kit (Thermo Scientific). The DNA probes were prepared through PCR amplification. DNA (20 fmol) and His-BaeR protein (1 µg) were mixed in binding buffer (10 mM Tris-HCl [pH 7.5], 50 mM KCl, and 1 mM DTT) and poly deoxyinosinic-deoxycytidylic acid (poly (dI-dC)) (50 ng/µL). The reaction mixtures (20 µl) were loaded onto a 5% polyacrylamide gel in 0.5 X TBE (45 mM Tris, 45 mM boric acid, and 1 mM EDTA at pH 8.3). The DNA-protein complexes were separated at 100 V for 2 hours in 0.5 X TBE buffer and then transferred to a Biotodyne B nylon membrane (Pall Corporation, Port Washington, NY). Crosslinking and detection of the His-labeled DNA-protein complexes were performed using a UV lamp and chemiluminescence, respectively.

## Statistical analysis

Depending on the suitability of the different samples, the difference in susceptibility was analyzed using chi-square or Fisher's exact test. The differences between two groups of isolates were considered significant at  $P < 0.05$ . Data entry and analyses were performed using the Statistical Package for the Social Sciences (SPSS) software version 15.0 (SPSS Inc., Chicago, IL, USA).

## Results

### Minimal inhibitory concentration (MIC) determination

The MIC of tigecycline for the wild-type *A. baumannii* ATCC 17978 strain, its *baeR* deletion mutant (AB1026), the *baeR*-reconstituted strain (AB1027), and the *baeR*-overexpressed strain (AB1028) were 0.5, 0.25, 0.5 and 1 µg/mL respectively [19]. The MICs obtained with the induced tigecycline-resistant strain ABtc, ABtcm and the clinical tigecycline-resistant strain ABh1 were 256, 256 and 16 µg/mL [19]. The tigecycline MIC of the clinical strain (ABh1) after two-week tigecycline induction (ABh1tc) was 128 µg/mL.

### The influence of the BaeSR TCS on AdeIJK and MacAB-TolC pump gene expression

Deleting *baeR* in the ATCC 17978 strain significantly led to 63%, 55%, 63%, 58%, 51% and 52% decrease in gene expression of *adeI*, *adeJ*, *adeK*, *tolC*, *macB* and *macA* respectively (Fig 1). To verify this result, the *baeR* deletion mutant was trans-complemented with pWH1266-*kan<sup>r</sup>*-*baeR*. The gene expression of *adeI*, *adeJ*, *adeK*, *tolC*, *macB* and *macA* in the complemented strains increased 2.6-, 1.9-, 1.9-, 1.8-, 1.7-, and 1.8-fold respectively while being compared with the *baeR* deletion mutant, implicating the reduced expression could be restored through trans-complementation. Introducing pWH1266-*kan<sup>r</sup>*-*baeR* into the ATCC 17978 strain yielded 1.2- to 1.3-fold increases in the expression of each gene without statistical significance except *tolC*.

### The expression of AdeIJK and MacAB-TolC pump genes in the laboratory-induced tigecycline-resistant *A. baumannii* and its *baeR* mutant strains

Gene expression of the AdeIJK pump in tigecycline-resistant *A. baumannii* strain (ABtc) increased 11-, 14- and 19-fold compared with the ATCC 17978 strain. However, gene



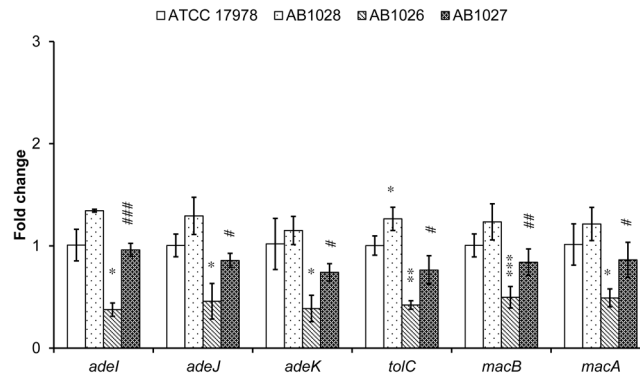

**Fig 1. The influence of the BaeSR TCS on AdeIJK and MacAB-TolC pump gene expression.** *baeR* deletion in the ATCC 17978 strain significantly reduced *adel*, *adeJ*, *adeK*, *tolC*, *macA* and *macB* expression. The reduced expression could be restored through trans-complementation with pWH1266-*kan<sup>r</sup>-baeR*. Introducing pWH1266-*kan<sup>r</sup>-baeR* into the ATCC 17978 strain mildly increased expression of these genes. The results are shown as the means  $\pm$  SD from three independent experiments. \*,  $P < 0.05$  and \*\*,  $P < 0.01$  and \*\*\*,  $P < 0.001$  between ATCC 17978 and AB1026; #,  $P < 0.05$  and ##,  $P < 0.01$  and ###, and  $P < 0.001$  between AB1026 and AB1027.

doi:10.1371/journal.pone.0132843.g001

expression of MacAB-TolC in ABtc exhibited an even more marked increase (49-fold for *tolC*, 45-fold for *macB* and 26-fold for *macA*) after tigecycline induction (Fig 2A). The expression levels of *adel*, *adeJ*, and *adeK* in the *baeR* mutant strain of ABtc (ABtcm) were 44%, 47%, and 59% decrease respectively compared to that in ABtc. Moreover, the expression levels of *tolC*, *macB*, and *macA* in ABtcm were 80%, 81%, and 85% lower, respectively, than in ABtc. These data confirm that BaeR contributes to AdeIJK and MacAB-TolC regulation, which may be involved in pumping tigecycline in *A. baumannii*.

### Expression analyses of AdeIJK and MacAB-TolC pump genes in the tigecycline-resistant *A. baumannii* clinical isolate

The expression levels of *adel*, *adeJ*, and *adeK* in ABh11 exhibited a statistically significant decrease compared with the wild-type strain (64%, 59%, and 41% reduction) (Fig 2B), whereas the expression levels of *tolC* and *macB* increased 1.7 and 2.3-fold, respectively. To verify these findings, the gene expression of AdeIJK and MacAB-TolC pumps was also examined in the clinical isolate with induced high tigecycline resistance (ABh11tc). Although the gene expression of *adel*, *adeJ*, and *adeK* in ABh11 showed marked decrease compared with the wild-type strain, these genes increased 9.4-, 27-, and 37-folds in the ABh11tc strain respectively compared with the ABh11 strain. The increased gene expression of *tolC*, *macB* and *macA* (15-, 4.6-, 3.1-folds respectively) was also observed in ABh11tc compared with ABh11.

### Phenotype microarray experiment using the *baeR* mutant

Susceptibility to some of the 72 studied compounds was examined using the ATCC 17978 and *baeR* mutant strains (referred to as ABwt and AB $\Delta$ *baeR* in Fig 3). After a 24 h incubation, no AB $\Delta$ *baeR* cell growth was observed at low concentrations of procaine, alexidine, and puromycin (in PM 15B); aminopyridine, oxycarboxin, caffeine, ethionamide, tannic acid (in PM17A); and difulphiram, iodonitro tetrazolium violet, and thioglycerol (in PM 19) compared with ABwt. In contrast, the ABwt cell growth was inhibited completely at low concentrations of oleandomycin and methyl viologen (in PM15B); niaproof and compound 48/80 in (PM17A); josamycin and FCCP (in PM19) compared with AB $\Delta$ *baeR*. Although the colors of some chemical compounds, such as tannic acid, cefperazone, and gallic acid, somehow interfere with the

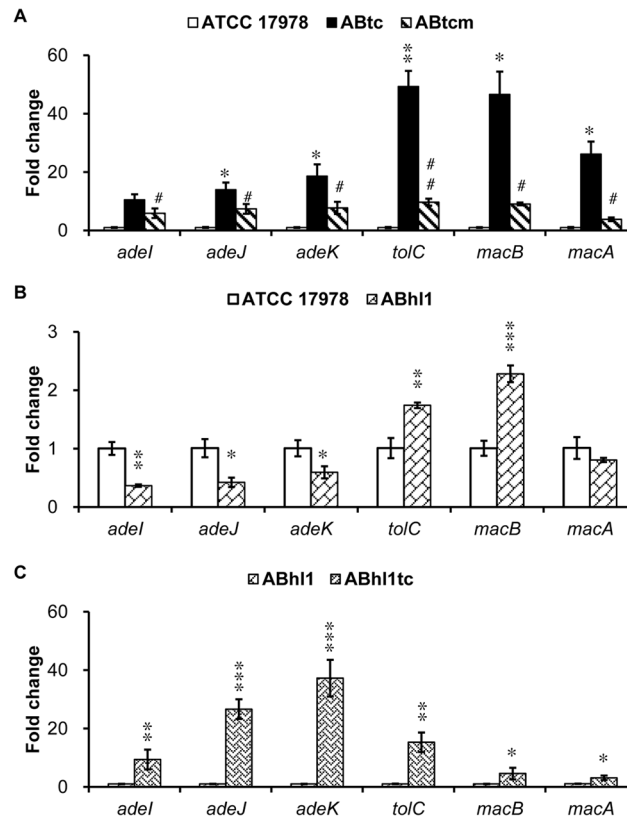

**Fig 2. Expression analyses of the AdelJK and MacAB-ToIC pump genes in the laboratory-induced and clinical tigecycline-resistant *A. baumannii* and their *baeR* mutant strains.** (A) Gene expression of the AdelJK pump in ABtc increased compared with the wild-type strain, whereas gene expression of MacAB-ToIC in ABtc exhibited a more marked increase after tigecycline induction. The expression levels of *adel*, *adeJ*, and *adeK* in the ABtcm strain were 44%, 47%, and 59% lower, respectively, than in ABtc, and the expression levels of *tolC*, *macB*, and *macA* in ABtcm were 80%, 81%, and 85% lower, respectively, than in ABtc. (B) The expression levels of *adel*, *adeJ*, and *adeK* in ABh1 exhibited a statistically significant decrease compared with the wild-type strain, whereas the expression levels of *tolC* and *macB* increased 1.7 and 2.3-fold, respectively. (C) The gene expression of *adel*, *adeJ*, *adeK*, *tolC*, *macB* and *macA* in the ABh1tc strain increased 9.4-, 27-, 37-, 15-, 4.6-, 3.1-fold respectively compared with the ABh1 strain. The results are displayed as the means  $\pm$  SD from three independent experiments. \*,  $P < 0.05$  and \*\*,  $P < 0.01$  and \*\*\*,  $P < 0.001$  between ATCC 17978 and ABtc or ABh1. #,  $P < 0.05$  and ##,  $P < 0.01$  between ABtc and ABtcm.

doi:10.1371/journal.pone.0132843.g002

determination of bacterial growth by Microplate Reader, with the help of subsequent bacterial cultures, tannic acid resistance was still shown as the most markedly compromised chemical after *baeR* deletion. Therefore, tannic acid was used for further study to determine the relationship between tannic acid and expression of *baeR* as well as pump genes.

### Confirmation of the phenotype microarray results using a spot assay

The ATCC 17978 strain can tolerate tannic acid as high as 250  $\mu\text{g}/\text{mL}$  (Fig 4A). However, we did not observe growth of 20  $\mu\text{L}$   $10^3$  cells/mL *baeR* mutant bacterial solution in the LB plate containing 50  $\mu\text{g}/\text{mL}$  tannic acid, whereas 100  $\mu\text{g}/\text{mL}$  tannic acid fully inhibited  $10^4$  cells/mL *baeR* mutant strain. In the presence of 150  $\mu\text{g}/\text{mL}$  tannic acid, no diluted bacterial solutions exhibited growth, except  $10^7$  cells/mL *baeR* mutant strain, which exhibited slight growth. With an increasing tannic acid concentration, none of the studied bacterial *baeR* mutant strain solutions grew.



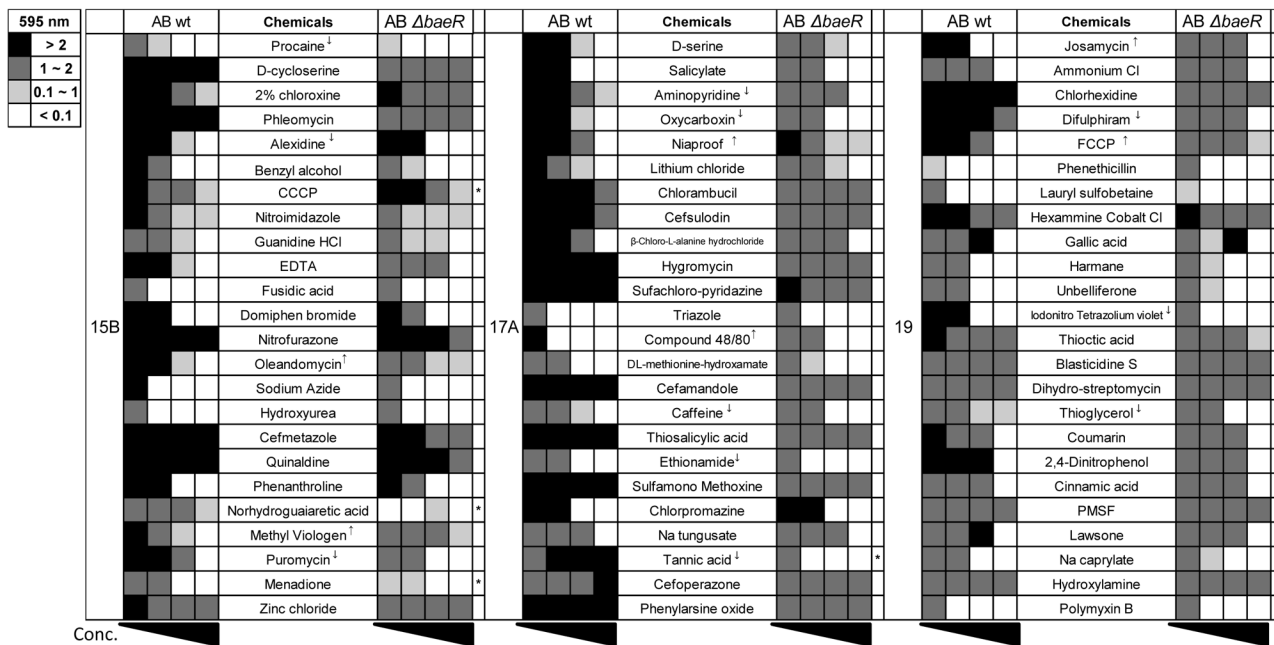

**Fig 3. Phenotype microarray using the *baeR* mutant.** Differential susceptibility to some of the 72 compounds studied was observed between the ABwt and ABΔ*baeR* strains. Four different concentrations of each compound were placed in individual wells next to each other in a row with increasing concentrations from the left to the right. The growth of *A. baumannii* was determined by measuring the optical density at 595 nm (OD<sub>595</sub>). Compared to ABwt, growth of ABΔ*baeR* was much sensitive with increasing concentrations of several compounds, including procaine, alexidine, and puromycin (in PM 15B); aminopyridine, oxycarboxin, caffeine, ethionamide, tannic acid (in PM 17A); and difluphiram, iodonitro tetrazolium violet, and thioglycerol (in PM 19). All these compounds inhibited ABΔ*baeR* cell growth were marked with ↓. Among them, tannic acid sensitivity was the most markedly compromised after deleting *baeR*. In contrast, ABΔ*baeR* exhibited better tolerance to oleandomycin, methyl viologen, niaproof, compound 48/80, josamycin and FCCP compared to ABwt (All these compounds were marked with ↑). \*: the color of the chemical compounds somehow interferes with the observation of bacterial growth.

doi:10.1371/journal.pone.0132843.g003

### Gene expression analyses of *baeR* and pump genes after tannic acid exposure

To understand the AdeAB, AdeIJK, MacAB-TolC, and BaeRS system responses upon tannic acid exposure, qRT-PCR of *adeB*, *adeJ*, *macB* and *baeR* was performed for the ATCC 17978, its *baeR* mutant strain and the clinical strain ABh11. At 50 μg/mL tannic acid, only *macB* exhibited a statistically significant increase (1.7-fold) in the *A. baumannii* ATCC 17978 strain (Fig 4B). With an increase in tannic acid up to 100 μg/mL, *baeR*, *adeJ* and *macB* exhibited increased gene expression (3.7-, 1.6- and 4.4-fold respectively) and were compared with samples that were not exposed to tannic acid. If the medium contained 500 μg/mL tannic acid, the expression of the genes investigated in the ATCC 17978 strain, *baeR*, *adeB*, *adeJ*, and *macB* clearly increased (6.8-, 5.0-, 3.1- and 6.2-fold respectively).

However, the *baeR* mutant strain cannot survive in the medium with 500 μg/mL tannic acid. The gene expression for *adeB*, *adeJ*, and *macB* in the *baeR* mutant strain significantly increased (3.3-, 2.9- and 1.6-fold respectively) at 50 μg/mL tannic acid (Fig 4C). Upon increasing the tannic acid concentration to 100 μg/mL, the gene expression decreased to the levels without tannic acid exposure.

In the clinical strain ABh11, the *baeR* gene expression increased 2.5 to 2.8 folds and the *adeB* gene expression increased 2.6-fold upon being exposed to 50, 100 and 500 μg/mL tannic acid (Fig 4D). The gene expression of *macB* increased 3.3-fold at 100 μg/mL tannic acid and increased 5.2-fold at 500 μg/mL tannic acid. However, the *adeJ* gene expression did not show significant fold change while being exposed to tannic acid.

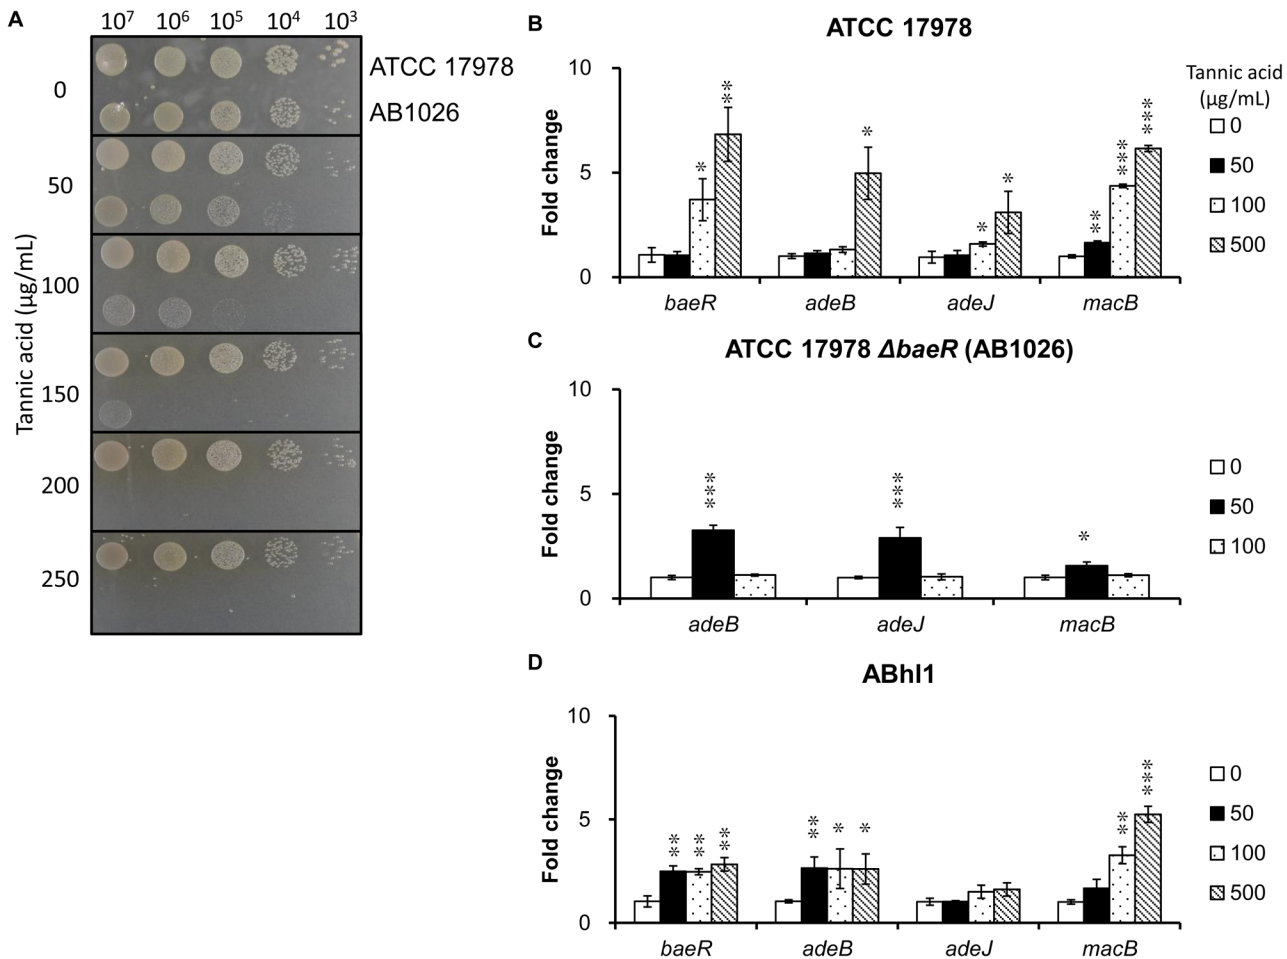

**Fig 4. Spot assays and gene expression analyses after tannic acid exposure.** (A) Spot assay. The wild-type strain exhibited better tolerance to tannic acid than the *baeR* mutant strain. (B) The gene expression levels of the *baeR* and pump genes in the wild-type strain. At 50 µg/mL tannic acid, only *macB* showed a statistically significant increase in the wild-type strain. Through increasing medium tannic acid up to 100 µg/mL, *baeR*, *adeJ* and *macB* exhibited increased gene expression. If the medium contained tannic acid 500 µg/mL, the expression of each gene investigated in the wild-type strain increased dramatically. (C) The gene expression levels of the pump genes in the *baeR* mutant strain. The gene expression of *adeB*, *adeJ*, and *macB* in the *baeR* mutant strain increased significantly at the tannic acid concentration 50 µg/mL. Through increasing the tannic acid concentration to 100 µg/mL, expression of each gene decreased to levels without tannic acid exposure. (D) The gene expression levels of the *baeR* and pump genes in the clinical strain ABh1. The gene expression of *baeR*, *adeB*, and *macB* demonstrated a statistically significant increase upon being exposed to 100 and 500 µg/mL tannic acid. The results are shown as the means ± SD from three independent experiments. \*,  $P < 0.05$  and \*\*,  $P < 0.01$  and \*\*\*,  $P < 0.001$ .

doi:10.1371/journal.pone.0132843.g004

### Electrophoretic mobility shift assays

EMSA was performed using different combinations of 10 fmol/µL biotin-labeled DNA (243-bp, 144-bp, and 329-bp DNA fragments upstream of *adeA*, *adeI* and *macA*, respectively), 2 pmol/µL unlabeled DNA and 0.05 µg/µL purified His-BaeR. Used as a nonspecific competitor, 50 ng/µL Poly (dI-dC) was also added. Adding His-BaeR protein to each biotin-labeled DNA probe did not cause band shift compared to the reaction with the probe only (no His-BaeR added) (S1 Fig). Therefore, we concluded that no protein-DNA complexes formed between His-BaeR protein and each of the *adeA*, *adeI* and *macA* promoter region. In addition to the purified His-BaeR, we also used total protein extract from *A. baumannii* ATCC 17978 and its *baeR*-deletion mutant. Band shift was observed from the reaction containing protein extract and each of the *adeA*, *adeI* and *macA* promoter region. The band shift did not appear in the reaction lacking of protein extract. Moreover, the band shift occurred in the reaction

using protein extract from either ATCC 17978 or the *baeR*-deletion strains. These results suggest that *adeA*, *adeI* and *macA* genes are controlled by regulator other than BaeR.

## Discussion

Bacterial two-component regulatory systems (TCSs), which consist of a sensor histidine kinase and a response regulator, facilitate changes in gene expression in response to environmental stimuli [34]. To ensure cell survival in harsh conditions, such as being exposed to hazardous chemicals, histidine kinase can sense the environmental signal and autophosphorylate. The phosphate is then transferred to an aspartic acid residue of the corresponding response regulator. The phosphorylated response regulator can thus elicit many diverse responses, including enhancing its DNA binding ability to modulate target gene expression [35]. Nineteen TCSs were identified in a clinical isolate of multidrug resistant *A. baumannii* by Adams et al., most of which were also in other clinical isolates, including *A. baumannii* AYE as well as ACICU, and 17 TCSs are conserved in the *A. baumannii* ATCC 17978 strain. However, functional studies on the TCSs and their downstream target genes are currently limited in *A. baumannii*. Only the TCSs PmrAB [36,37], BfmRS [38,39], AdeRS [15,16], BaeSR [19] and GacSA [40] have been characterized. Colistin resistance in *A. baumannii* can be due to adding phosphoethanolamine to cell wall lipopolysaccharide, which is mediated by *pmrAB* mutations [36]. Over-expression of the AdeABC efflux pump stimulated by the mutated AdeRS results in antimicrobial resistance, including tigecycline resistance, in multidrug-resistant *A. baumannii* (MDRAB) [16]. BfmRS TCS is related to biofilm formation [38] and mediates virulence in *A. baumannii* [39], whereas GacSA acts as a global virulence regulator and involves pili formation, motility and biofilm structure [40]. Nevertheless, the role of *A. baumannii* TCSs in disposing environmental chemical compounds has not been clarified.

Similar to other TCSs, BaeSR can detect environmental signals and respond by altering the bacterial envelope [25]. We have shown that the BaeSR regulons not only respond to high osmotic stress but also influence the tigecycline susceptibility of *A. baumannii* through positively regulating the RND efflux pump genes *adeA* and *adeB* [19]. In this study, an additional two transport systems, AdeIJK and MacAB-TolC, may have also been regulated by BaeSR because *baeR* deletion reduced gene expression in the two pump systems. This result is consistent with transcriptional data from an LPS-deficient *A. baumannii* strain, which showed the increased expression of BaeSR, AdeIJK and MacAB-TolC [30].

Tigecycline is a glycycline and is one of the few available effective antibiotics for MDRAB infections [41]. Several previous studies have demonstrated that tigecycline resistance is mainly facilitated through efflux pumps, including AdeABC [7], AdeIJK [10] and AdeFGH [9]. The AdeABC and AdeIJK efflux systems' tigecycline resistance is greater than an additive contribution [10]. In this study, qRT-PCR data also demonstrated a potential role for AdeIJK and MacAB-TolC in tigecycline resistance of the laboratory-induced tigecycline-resistant *A. baumannii* strains (ABtc and ABh1tc). In 2011, Coyne et al. declared that AdeABC was the only system involved in clinical isolate tigecycline resistance [42]. Besides, AdeIJK is considered to play a role in the intrinsic low-level resistant phenotype of *A. baumannii* [10] and over-expression of this pump in *A. baumannii* is toxic, suggesting the presence of a tight regulation mechanism to maintain low expression levels of AdeIJK [43] in ABh1 compared with the wild type strain.

In addition to conferring clinically relevant resistance to antibiotics, these multidrug-resistance efflux pumps encoded by bacteria can also confer resistance to natural substances produced by the host [13]. To elucidate the TCS BaeSR response after being exposed to environmental chemical compounds through the efflux pumps, we used a phenotypic microarray. *A. baumannii* was vulnerable to certain chemicals, especially tannic acid, after *baeR* deletion.

Tannins comprise a large group of natural products distributed in the vegetable kingdom and has been classified into two groups, condensed and hydrolysable [44]. Tannic acid has long been used as a topical agent for burn wounds. Tannic acid was further proposed as an adjuvant therapy with  $\beta$ -lactam antibiotics for *Staphylococcus aureus* infections [45]. Susceptibility of MDRA to a variety of antibiotics was also enhanced in the presence of tannic acids [46]. The antioxidant capacity and antimicrobial activity of tannic acid can be enhanced by thermal processing [47]. Despite tannin antimicrobial activities, many tannin-resistant bacteria have been isolated. However, the mechanisms underlying this resistance remain unclear. The TCS BaeSR has been thought to mediate tannic acid resistance through up-regulating the multidrug transporter-encoding operon *mdtABCD* in *E. coli* [26]. In our previous and present studies, we found that both tigecycline and tannic acid resistance are associated with the BaeR regulon in *A. baumannii* using qRT-PCR data. *baeR* gene deletion influenced gene expression for the AdeAB, AdeIJK and MacAB-TolC pump systems. Increased gene expression of *adeB*, *adeJ*, and *macB* after being exposed to tigecycline or high concentration of tannic acid was also demonstrated. These results suggested a modified role for BaeR, as Appia-Ayme et al. proposed, in up-regulating certain pump systems in response to specific envelop damaging agents as a belt and braces approach to protect the cell through waste disposal [23].

As shown in Fig 4B, the *baeR* gene expression did not increase upon exposure to 50  $\mu\text{g/mL}$  tannic acid, whereas *macB* expression showed a slight increase. In addition, similar to the *baeR* gene, the *adeB* and *adeJ* gene expression was also no change in the presence of 50  $\mu\text{g/mL}$  tannic acid. These results suggest that *macB* gene expression may be controlled by a regulator other than BaeR. Interestingly, the expression of *adeB*, *adeJ* and *macB* pump genes was increased in the *baeR*-deletion background with 50  $\mu\text{g/mL}$  tannic acid, whereas decreased with 100  $\mu\text{g/mL}$  tannic acid (Fig 4C). One possible explanation is that the *A. baumannii* efflux pumps were mainly controlled by local regulators (e.g., AdeRS controls *adeAB* and AdeN controls *adeIJK*) upon exposure to low tannic acid concentrations. However, the BaeR regulon includes these pump genes at higher tannic acid concentrations. This hypothesis highlights the complex transcription regulatory networks in *A. baumannii* and requires further study. Moreover, EMSAs of the interaction between BaeR-His6 and the *adeA*, *adeI* and *macA* promoter regions did not exhibit direct binding, which implies that their mutual interaction is possibly indirect. One previous paper indicates that BaeSR is part of a cross-regulation system that includes the PhoBR and CreBC TCSs in *E. coli* [29]; it suggests that constructing the BaeSR mutants may not only affect the expression levels of genes under direct control of BaeSR but may disrupt a complex regulatory network.

Despite the few results for TCS in *A. baumannii*, it remains a possible target for therapeutics, which is supported by the conclusion from Gram-positive pathogenic bacteria [48]. A class of antibacterial agents that inhibit two-component signal transduction systems was developed in the laboratory and may represent a breakthrough in antibacterial therapy [49]. Moreover, a small molecule adjuvant was found capable of suppressing colistin resistance in MDRA by interfering with the expression of TCS PmrCAB [50]. In conclusion, *A. baumannii* can use the TCS BaeSR in disposing chemicals, such as tannic acid and tigecycline, through regulating efflux pumps without direct DNA binding. Our findings may help to understand TCS and efflux pumps-associated antimicrobial resistance mechanisms and provide a basis for the future development of antimicrobials against drug-resistant *A. baumannii*.

## Supporting Information

**S1 Fig. Electrophoretic mobility shift assays.**  
(PDF)

## Author Contributions

Conceived and designed the experiments: MFL YYL CYL. Performed the experiments: YYL. Analyzed the data: MFL YYL. Contributed reagents/materials/analysis tools: MFL CYL. Wrote the paper: MFL CYL.

## References

1. Hooper DC (2005) Efflux pumps and nosocomial antibiotic resistance: a primer for hospital epidemiologists. *Clin Infect Dis* 40: 1811–1817. PMID: [15909271](#)
2. Vila J, Marti S, Sanchez-Cespedes J (2007) Porins, efflux pumps and multidrug resistance in *Acinetobacter baumannii*. *J Antimicrob Chemother* 59: 1210–1215. PMID: [17324960](#)
3. Wieczorek P, Sacha P, Hauschild T, Zorawski M, Krawczyk M, Tryniszewska E (2008) Multidrug resistant *Acinetobacter baumannii*—the role of AdeABC (RND family) efflux pump in resistance to antibiotics. *Folia Histochem Cytobiol* 46: 257–267. doi: [10.2478/v10042-008-0056-x](#) PMID: [19056528](#)
4. Roca I, Marti S, Espinal P, Martinez P, Gibert I, Vila J (2009) CraA, a major facilitator superfamily efflux pump associated with chloramphenicol resistance in *Acinetobacter baumannii*. *Antimicrob Agents Chemother* 53: 4013–4014. doi: [10.1128/AAC.00584-09](#) PMID: [19581458](#)
5. Su XZ, Chen J, Mizushima T, Kuroda T, Tsuchiya T (2005) AbeM, an H<sup>+</sup>-coupled *Acinetobacter baumannii* multidrug efflux pump belonging to the MATE family of transporters. *Antimicrob Agents Chemother* 49: 4362–4364. PMID: [16189122](#)
6. Srinivasan VB, Rajamohan G, Gebreyes WA (2009) Role of AbeS, a novel efflux pump of the SMR family of transporters, in resistance to antimicrobial agents in *Acinetobacter baumannii*. *Antimicrob Agents Chemother* 53: 5312–5316. doi: [10.1128/AAC.00748-09](#) PMID: [19770280](#)
7. Ruzin A, Keeney D, Bradford PA (2007) AdeABC multidrug efflux pump is associated with decreased susceptibility to tigecycline in *Acinetobacter calcoaceticus*-*Acinetobacter baumannii* complex. *J Antimicrob Chemother* 59: 1001–1004. PMID: [17363424](#)
8. Magnet S, Courvalin P, Lambert T (2001) Resistance-nodulation-cell division-type efflux pump involved in aminoglycoside resistance in *Acinetobacter baumannii* strain BM4454. *Antimicrob Agents Chemother* 45: 3375–3380. PMID: [11709311](#)
9. Coyne S, Rosenfeld N, Lambert T, Courvalin P, Perichon B (2010) Overexpression of resistance-nodulation-cell division pump AdeFGH confers multidrug resistance in *Acinetobacter baumannii*. *Antimicrob Agents Chemother* 54: 4389–4393. doi: [10.1128/AAC.00155-10](#) PMID: [20696879](#)
10. Damier-Piolle L, Magnet S, Bremont S, Lambert T, Courvalin P (2008) AdeIJK, a resistance-nodulation-cell division pump effluxing multiple antibiotics in *Acinetobacter baumannii*. *Antimicrob Agents Chemother* 52: 557–562. PMID: [18086852](#)
11. Hou PF, Chen XY, Yan GF, Wang YP, Ying CM (2012) Study of the correlation of imipenem resistance with efflux pumps AdeABC, AdeIJK, AdeDE and AbeM in clinical isolates of *Acinetobacter baumannii*. *Chemotherapy* 58: 152–158. doi: [10.1159/000335599](#) PMID: [22614896](#)
12. Deng M, Zhu MH, Li JJ, Bi S, Sheng ZK, Hu FS, et al. (2014) Molecular epidemiology and mechanisms of tigecycline resistance in clinical isolates of *Acinetobacter baumannii* from a Chinese university hospital. *Antimicrob Agents Chemother* 58: 297–303. doi: [10.1128/AAC.01727-13](#) PMID: [24165187](#)
13. Piddock LJ (2006) Multidrug-resistance efflux pumps—not just for resistance. *Nat Rev Microbiol* 4: 629–636. PMID: [16845433](#)
14. Rajamohan G, Srinivasan VB, Gebreyes WA (2010) Molecular and functional characterization of a novel efflux pump, AmvA, mediating antimicrobial and disinfectant resistance in *Acinetobacter baumannii*. *J Antimicrob Chemother* 65: 1919–1925. doi: [10.1093/jac/dkq195](#) PMID: [20573661](#)
15. Marchand I, Damier-Piolle L, Courvalin P, Lambert T (2004) Expression of the RND-type efflux pump AdeABC in *Acinetobacter baumannii* is regulated by the AdeRS two-component system. *Antimicrob Agents Chemother* 48: 3298–3304. PMID: [15328088](#)
16. Sun JR, Perng CL, Chan MC, Morita Y, Lin JC, Su CM, et al. (2012) A truncated AdeS kinase protein generated by IS*Aba1* insertion correlates with tigecycline resistance in *Acinetobacter baumannii*. *PLoS One* 7: e49534. doi: [10.1371/journal.pone.0049534](#) PMID: [23166700](#)
17. Rosenfeld N, Bouchier C, Courvalin P, Perichon B (2012) Expression of the resistance-nodulation-cell division pump AdeIJK in *Acinetobacter baumannii* is regulated by AdeN, a TetR-type regulator. *Antimicrob Agents Chemother* 56: 2504–2510. doi: [10.1128/AAC.06422-11](#) PMID: [22371895](#)
18. Ma D (1996) The local repressor AcrR plays a modulating role in the regulation of *acrAB* genes of *Escherichia coli* by global stress signals. *Mol Microbiol* 19: 102–111.



19. Lin MF, Lin YY, Yeh HW, Lan CY (2014) Role of the BaeSR two-component system in the regulation of *Acinetobacter baumannii* *adeAB* genes and its correlation with tigecycline susceptibility. *BMC Microbiol* 14: 119. doi: [10.1186/1471-2180-14-119](https://doi.org/10.1186/1471-2180-14-119) PMID: [24885279](https://pubmed.ncbi.nlm.nih.gov/24885279/)
20. Rowley G, Spector M, Kormanec J, Roberts M (2006) Pushing the envelope: extracytoplasmic stress responses in bacterial pathogens. *Nat Rev Microbiol* 4: 383–394. PMID: [16715050](https://pubmed.ncbi.nlm.nih.gov/16715050/)
21. Bury-Mone S, Nomane Y, Reymond N, Barbet R, Jacquet E, Imbeaud S, et al. (2009) Global analysis of extracytoplasmic stress signaling in *Escherichia coli*. *PLoS Genet* 5: e1000651. doi: [10.1371/journal.pgen.1000651](https://doi.org/10.1371/journal.pgen.1000651) PMID: [19763168](https://pubmed.ncbi.nlm.nih.gov/19763168/)
22. Leblanc SK, Oates CW, Raivio TL (2011) Characterization of the induction and cellular role of the BaeSR two-component envelope stress response of *Escherichia coli*. *J Bacteriol* 193: 3367–3375. doi: [10.1128/JB.01534-10](https://doi.org/10.1128/JB.01534-10) PMID: [21515766](https://pubmed.ncbi.nlm.nih.gov/21515766/)
23. Appia-Ayme C, Patrick E, Sullivan MJ, Alston MJ, Field SJ, AbuOun M, et al. (2011) Novel inducers of the envelope stress response BaeSR in *Salmonella Typhimurium*: BaeR is critically required for tungstate waste disposal. *PLoS One* 6: e23713. doi: [10.1371/journal.pone.0023713](https://doi.org/10.1371/journal.pone.0023713) PMID: [21886814](https://pubmed.ncbi.nlm.nih.gov/21886814/)
24. Wang D, Fierke CA (2013) The BaeSR regulon is involved in defense against zinc toxicity in *E. coli*. *Metallomics* 5: 372–383. doi: [10.1039/c3mt20217h](https://doi.org/10.1039/c3mt20217h) PMID: [23446818](https://pubmed.ncbi.nlm.nih.gov/23446818/)
25. Baranova N, Nikaido H (2002) The baeSR two-component regulatory system activates transcription of the *yegMNOB* (*mdtABCD*) transporter gene cluster in *Escherichia coli* and increases its resistance to novobiocin and deoxycholate. *J Bacteriol* 184: 4168–4176. PMID: [12107134](https://pubmed.ncbi.nlm.nih.gov/12107134/)
26. Zoetendal EG, Smith AH, Sundset MA, Mackie RI (2008) The BaeSR two-component regulatory system mediates resistance to condensed tannins in *Escherichia coli*. *Appl Environ Microbiol* 74: 535–539. PMID: [18039828](https://pubmed.ncbi.nlm.nih.gov/18039828/)
27. Zhou L, Lei XH, Bochner BR, Wanner BL (2003) Phenotype MicroArray analysis of *Escherichia coli* K-12 mutants with deletions of all two-component systems. *J Bacteriol* 185: 4956–4972. PMID: [12897016](https://pubmed.ncbi.nlm.nih.gov/12897016/)
28. Nishino K, Nikaido E, Yamaguchi A (2007) Regulation of multidrug efflux systems involved in multidrug and metal resistance of *Salmonella enterica* serovar *Typhimurium*. *J Bacteriol* 189: 9066–9075. PMID: [17933888](https://pubmed.ncbi.nlm.nih.gov/17933888/)
29. Nishino K, Honda T, Yamaguchi A (2005) Genome-wide analyses of *Escherichia coli* gene expression responsive to the BaeSR two-component regulatory system. *J Bacteriol* 187: 1763–1772. PMID: [15716448](https://pubmed.ncbi.nlm.nih.gov/15716448/)
30. Henry R, Vithanage N, Harrison P, Seemann T, Coutts S, Moffatt JH, et al. (2012) Colistin-resistant, lipopolysaccharide-deficient *Acinetobacter baumannii* responds to lipopolysaccharide loss through increased expression of genes involved in the synthesis and transport of lipoproteins, phospholipids, and poly-beta-1,6-N-acetylglucosamine. *Antimicrob Agents Chemother* 56: 59–69. doi: [10.1128/AAC.05191-11](https://doi.org/10.1128/AAC.05191-11) PMID: [22024825](https://pubmed.ncbi.nlm.nih.gov/22024825/)
31. Clinical and Laboratory Standards Institute (CLSI) (2012). *Methods for Dilution Antimicrobial Susceptibility Tests for Bacteria That Grow Aerobically; Approved Standard—Ninth Edition*. CLSI document M07-A9. Clinical and Laboratory Standards Institute, Wayne, PA.
32. Pachon-Ibanez ME, Jimenez-Mejias ME, Pichardo C, Llanos AC, Pachon J (2004) Activity of tigecycline (GAR-936) against *Acinetobacter baumannii* strains, including those resistant to imipenem. *Antimicrob Agents Chemother* 48: 4479–4481. PMID: [15504889](https://pubmed.ncbi.nlm.nih.gov/15504889/)
33. Sambrook J, Russell DW (2001) *Molecular Cloning: A Laboratory Manual*. 3rd ed. Cold Spring Harbor, NY: Cold Spring Harbor Laboratory Press.
34. Alm E, Huang K, Arkin A (2006) The evolution of two-component systems in bacteria reveals different strategies for niche adaptation. *PLoS Comput Biol* 2: e143. PMID: [17083272](https://pubmed.ncbi.nlm.nih.gov/17083272/)
35. West AH, Stock AM (2001) Histidine kinases and response regulator proteins in two-component signaling systems. *Trends Biochem Sci* 26: 369–376. PMID: [11406410](https://pubmed.ncbi.nlm.nih.gov/11406410/)
36. Adams MD, Nickel GC, Bajaksouzian S, Lavender H, Murthy AR, Jacobs MR, et al. (2009) Resistance to colistin in *Acinetobacter baumannii* associated with mutations in the PmrAB two-component system. *Antimicrob Agents Chemother* 53: 3628–3634. doi: [10.1128/AAC.00284-09](https://doi.org/10.1128/AAC.00284-09) PMID: [19528270](https://pubmed.ncbi.nlm.nih.gov/19528270/)
37. Beceiro A, Llobet E, Aranda J, Bengoechea JA, Doumith M, Hornsey M, et al. (2011) Phosphoethanolamine modification of lipid A in colistin-resistant variants of *Acinetobacter baumannii* mediated by the *pmrAB* two-component regulatory system. *Antimicrob Agents Chemother* 55: 3370–3379. doi: [10.1128/AAC.00079-11](https://doi.org/10.1128/AAC.00079-11) PMID: [21576434](https://pubmed.ncbi.nlm.nih.gov/21576434/)
38. Tomaras AP, Flagler MJ, Dorsey CW, Gaddy JA, Actis LA (2008) Characterization of a two-component regulatory system from *Acinetobacter baumannii* that controls biofilm formation and cellular morphology. *Microbiology* 154: 3398–3409. doi: [10.1099/mic.0.2008/019471-0](https://doi.org/10.1099/mic.0.2008/019471-0) PMID: [18957593](https://pubmed.ncbi.nlm.nih.gov/18957593/)



39. Liou ML, Soo PC, Ling SR, Kuo HY, Tang CY, Chang KC (2013) The sensor kinase BfmS mediates virulence in *Acinetobacter baumannii*. *J Microbiol Immunol Infect* 47: 275–281. doi: [10.1016/j.jmii.2012.12.004](https://doi.org/10.1016/j.jmii.2012.12.004) PMID: [23453128](https://pubmed.ncbi.nlm.nih.gov/23453128/)
40. Cerqueira GM, Kostoulias X, Khoo C, Aibinu I, Qu Y, Traven A, et al. (2014) A global virulence regulator in *Acinetobacter baumannii* and its control of the phenylacetic acid catabolic pathway. *J Infect Dis* 210: 46–55. PMID: [24431277](https://pubmed.ncbi.nlm.nih.gov/24431277/)
41. Anthony KB, Fishman NO, Linkin DR, Gasink LB, Edelstein PH, Lautenbach E (2008) Clinical and microbiological outcomes of serious infections with multidrug-resistant gram-negative organisms treated with tigecycline. *Clin Infect Dis* 46: 567–570. doi: [10.1086/526775](https://doi.org/10.1086/526775) PMID: [18199038](https://pubmed.ncbi.nlm.nih.gov/18199038/)
42. Coyne S, Courvalin P, Perichon B (2011) Efflux-mediated antibiotic resistance in *Acinetobacter* spp. *Antimicrob Agents Chemother* 55: 947–953. doi: [10.1128/AAC.01388-10](https://doi.org/10.1128/AAC.01388-10) PMID: [21173183](https://pubmed.ncbi.nlm.nih.gov/21173183/)
43. Roca I, Espinal P, Vila-Farres X, Vila J (2012) The *Acinetobacter baumannii* Oxymoron: Commensal Hospital Dweller Turned Pan-Drug-Resistant Menace. *Front Microbiol* 3: 148. doi: [10.3389/fmicb.2012.00148](https://doi.org/10.3389/fmicb.2012.00148) PMID: [22536199](https://pubmed.ncbi.nlm.nih.gov/22536199/)
44. Hupkens P, Boxma H, Dokter J (1995) Tannic acid as a topical agent in burns: historical considerations and implications for new developments. *Burns* 21: 57–61. PMID: [7718122](https://pubmed.ncbi.nlm.nih.gov/7718122/)
45. Akiyama H, Fujii K, Yamasaki O, Oono T, Iwatsuki K (2001) Antibacterial action of several tannins against *Staphylococcus aureus*. *J Antimicrob Chemother* 48: 487–491. PMID: [11581226](https://pubmed.ncbi.nlm.nih.gov/11581226/)
46. Chusri S, Villanueva I, Voravuthikunchai SP, Davies J (2009) Enhancing antibiotic activity: a strategy to control *Acinetobacter* infections. *J Antimicrob Chemother* 64: 1203–1211. doi: [10.1093/jac/dkp381](https://doi.org/10.1093/jac/dkp381) PMID: [19861335](https://pubmed.ncbi.nlm.nih.gov/19861335/)
47. Kim TJ, Silva JL, Kim MK, Jung YS (2010) Enhanced antioxidant capacity and antimicrobial activity of tannic acid by thermal processing. *Food Chemistry* 118: 740–746.
48. Stephenson K, Hoch JA (2002) Virulence- and antibiotic resistance-associated two-component signal transduction systems of Gram-positive pathogenic bacteria as targets for antimicrobial therapy. *Pharmacol Ther* 93: 293–305. PMID: [12191621](https://pubmed.ncbi.nlm.nih.gov/12191621/)
49. Barrett JF, Goldschmidt RM, Lawrence LE, Foleno B, Chen R, Demers JP, et al. (1998) Antibacterial agents that inhibit two-component signal transduction systems. *Proc Natl Acad Sci U S A* 95: 5317–5322. PMID: [9560273](https://pubmed.ncbi.nlm.nih.gov/9560273/)
50. Harris TL, Worthington RJ, Hittle LE, Zurawski DV, Ernst RK, Melander C (2014) Small molecule down-regulation of PmrAB reverses lipid A modification and breaks colistin resistance. *ACS Chem Biol* 9: 122–127. doi: [10.1021/cb400490k](https://doi.org/10.1021/cb400490k) PMID: [24131198](https://pubmed.ncbi.nlm.nih.gov/24131198/)
